# Supplementary material for: Theoretical and Experimental Assay of Shock Experienced by Yeast Cells during Laser Bioprinting
Source: MDPI journal article supplement (doi:10.3390/ijms23179823), 2022-08-29
Supplement: s1 [file s1]

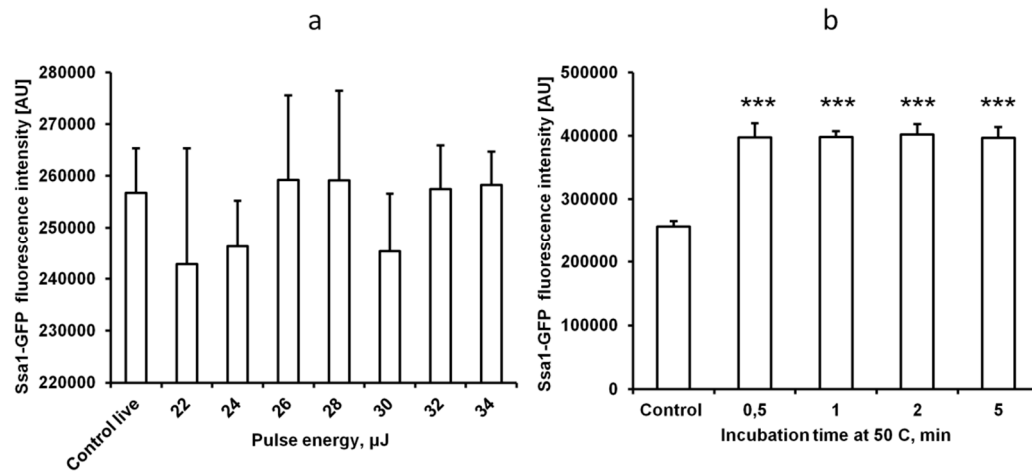

**Figure SI. Cells that were grown to lower densities did exhibit an increase of Ssa1-GFP levels in response to 50 C heat shock , but did not do so in response to LIFT . (a) Relation between level of median GFP fluorescence and the laser pulse intensity (in PI-negative cells with noticeable GFP fluorescence) ( $p \geq 0,1$ , Student's t-test) (b) Fluorescence of yeast cells producing Ssa1-GFP after treatment with the indicated temperature ( $p \leq 0,01$  (\*\*), Student's t-test)**
